# Supplementary material for: SOX2 promotes resistance of melanoma with PD-L1 high expression to T-cell-mediated cytotoxicity that can be reversed by SAHA
Source: HighWire-hosted journal article supplement (doi:10.1136/jitc-2020-001037), 2020-11-01
Supplement: jitc-2020-001037supp001_data_supplement.pdf [file jitc-2020-001037supp001_data_supplement.pdf]

1 **Supplementary Materials**

2

|                                                                                                                                                                              |
|------------------------------------------------------------------------------------------------------------------------------------------------------------------------------|
| <b>Supplementary figure 1.</b> The impact of SOX2 on CD8 <sup>+</sup> T cell killing <i>in vivo</i> .                                                                        |
| <b>Supplementary figure 2.</b> The function of SOX2 on tumor growth and patients survival.                                                                                   |
| <b>Supplementary figure 3.</b> SAHA decreased SOX2 level through promoting SOX2 acetylation and degradation.                                                                 |
| <b>Supplementary figure 4.</b> Representative dot plots of indicated cells.                                                                                                  |
| <b>Supplementary figure 5.</b> SAHA induced PTPN1 and SOCS3 expression and recovered the sensitivity of melanoma cells to T cell killing.                                    |
| <b>Supplementary figure 6.</b> Representative dot plots of indicated cells.                                                                                                  |
| <b>Supplementary figure 7.</b> The correlation between SOX2 and clinical response to anti-PD-1 based on CD8 or IFN $\gamma$ expression.                                      |
| <b>Supplementary figure 8.</b> The correlation between SOX2 and clinical response to anti-PD-1 in melanoma with PD-L1 low expression.                                        |
| <b>Supplementary table 1.</b> Comparison of clinicopathologic characteristics based on SOX2 and PD-L1 status before nivolumab therapy.                                       |
| <b>Supplementary table 2.</b> Comparison of clinicopathological characteristics based on SOX2 and PD-L1 status 4 weeks after initiation of nivolumab.                        |
| <b>Supplementary table 3.</b> Multivariate Cox regression analysis of clinicopathological factors overall survival in melanoma patients before nivolumab therapy.            |
| <b>Supplementary table 4.</b> Multivariate Cox regression analysis of clinicopathologic factors overall survival in melanoma patients 4 weeks after initiation of nivolumab. |

**Supplementary figure 1. The impact of SOX2 on CD8<sup>+</sup> T cell killing *in vivo*.**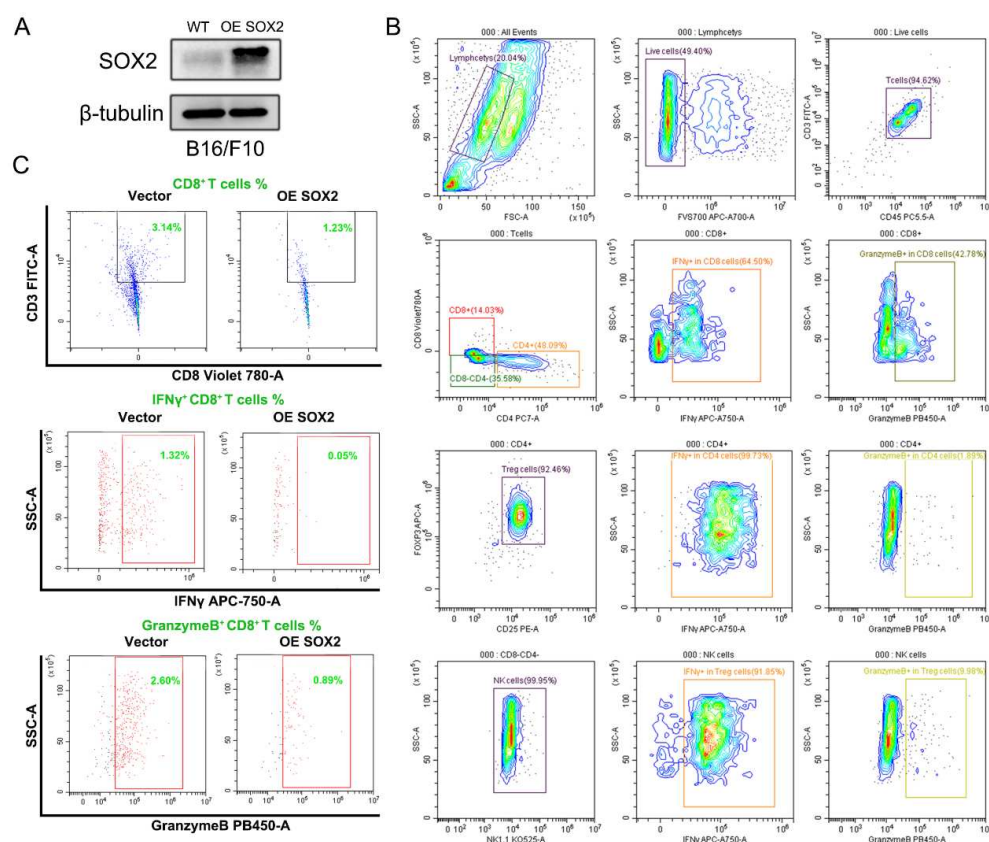

(A) The expression of SOX2 was assessed with western blot analysis. B16/F10 cells transfected with control vector or plasmids encoding Flag-mSOX2. (B) Gating strategy for multicolor flow cytometry analysis of tumor infiltrating lymphocytes. (C) Representative dot plots of CD8<sup>+</sup> T in the TILs, CD8<sup>+</sup> IFNγ<sup>+</sup> T in CD8<sup>+</sup> T cells and CD8<sup>+</sup> GranzymeB<sup>+</sup> T in CD8<sup>+</sup> T cells isolated from a representative mouse for each group.

**Supplementary figure 2. The function of SOX2 on tumor growth and patients survival.**

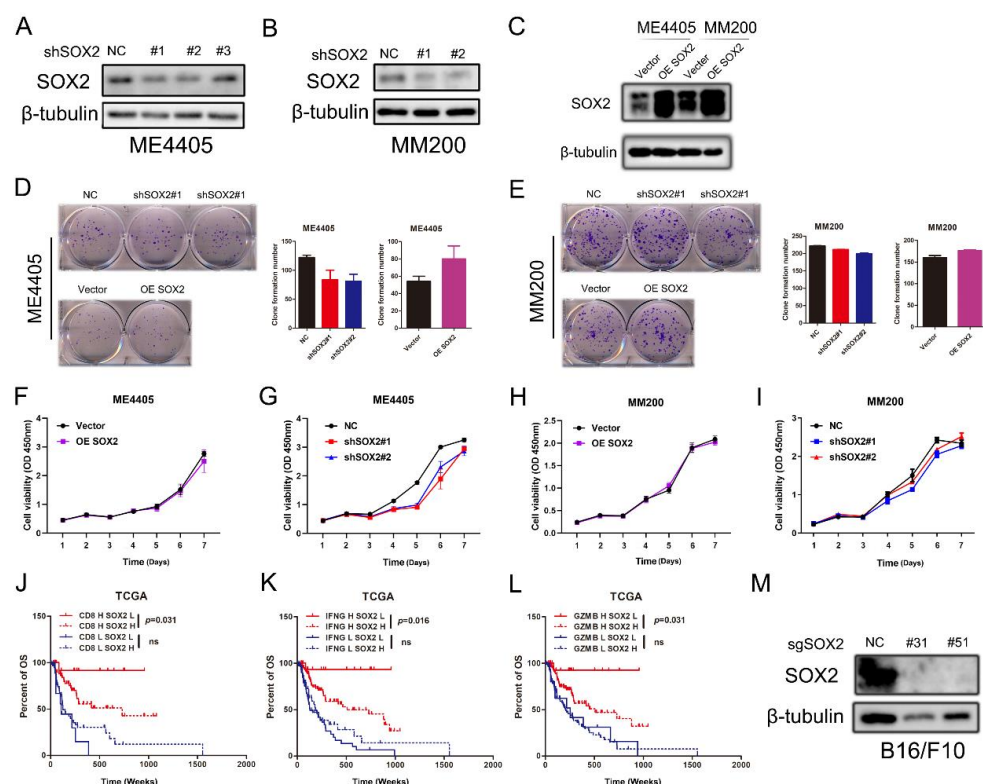

(A-C) The expression of SOX2 was assessed with western blot analysis. ME4405 cells (A) and MM200 cells (B) transfected with negative control or plasmids encoding shSOX2; ME4405 cells and MM200 cells were transiently transfected with control vector or plasmids encoding Flag-hSOX2 (C). (D-I) The function of SOX2 on tumor growth *in vitro*. ME4405 cells and MM200 cells transfected with indicated plasmid and sent for colony formation assay (D, E) and CCK8 assay (F-I). (J-L) Kaplan-Meier survival curves comparing the OS based on SOX2 and CD8 status (J), SOX2 and IFNG status (K), SOX2 and GZMB status (L). (M) The expression of SOX2 in B16/F10 cells transfected with indicated negative control or plasmids encoding shSOX2. Error bars indicate SEM. Unpaired two-tailed t tests for two groups comparison. One-way ANOVA test for three or more groups comparison. NS, not significant; \*\*\*  $p < 0.001$ , \*\*  $p < 0.01$ , \*  $p < 0.05$ .

**Supplementary figure 3. SAHA decreased SOX2 level through promoting SOX2**

**acetylation and degradation.**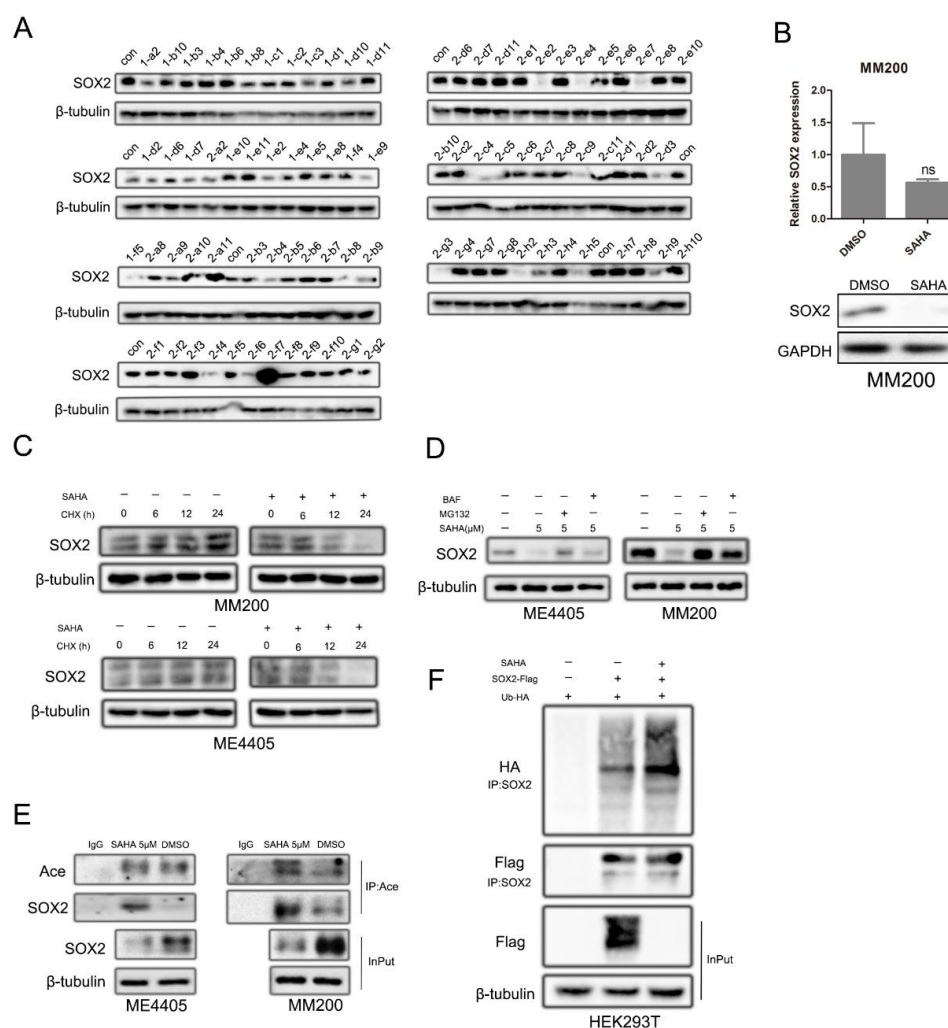

(A) Screen results by western blot in MM200 cells. MM200 cells were treated with 1000 IU/mL IFN $\gamma$  and 5  $\mu$ M epigenetic inhibitors for 24 hr. (B) Change of SOX2 protein level and mRNA according to western blot and qPCR assay. MM200 cells were treated with or without 5  $\mu$ M SAHA for 24hr. (C) Change of SOX2 protein level determined by western blot. Melanoma cells were treated with 25  $\mu$ g/ml CHX alone or 25  $\mu$ g/ml CHX plus 5  $\mu$ M SAHA for different time. (D) SAHA promoted SOX2 degradation. Melanoma cells were incubated with 5  $\mu$ M SAHA for 24hr, and then treated with 10  $\mu$ M MG132 for 6hr or 100 nM Bafilomycin A1 for 12hr. (E) SAHA increased the acetylation SOX2. Melanoma cells were treated with SAHA for 24hr. Immunoprecipitated acetylation was subjected to anti-SOX2 western blotting. (F)

SAHA increased ubiquitination of endogenous SOX2. HEK293T cells were transiently co-transfected with vector and plasmids encoding Flag-hSOX2 or HA-Ub, treated with SAHA for 24hr. Immunoprecipitated Flag-hSOX2 was subjected to anti-HA-Ub western blotting. Error bars indicate SEM. Unpaired two-tailed t test, NS, not significant.

**Supplementary figure 4. Representative dot plots of indicated cells.**

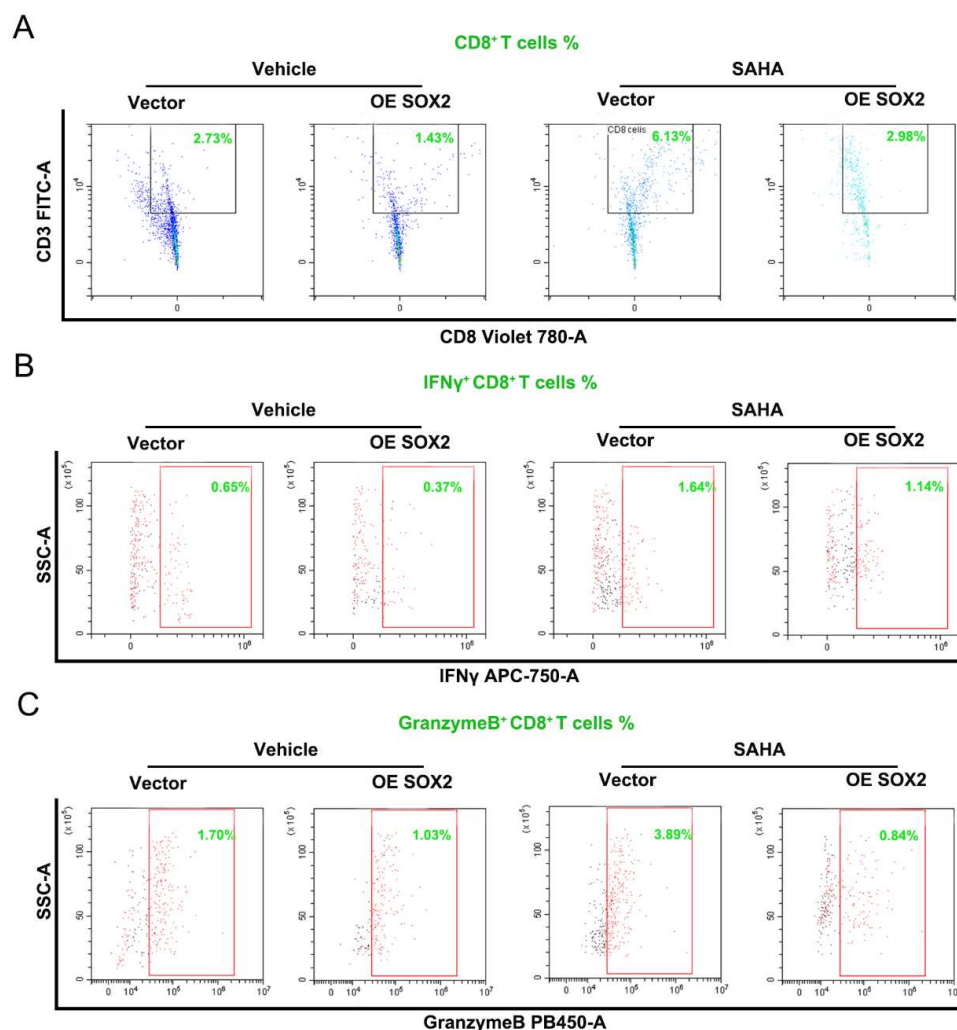

(A-C) Representative dot plots of CD8<sup>+</sup> T in the TILs (A), CD8<sup>+</sup> IFN $\gamma$ <sup>+</sup> T in CD8<sup>+</sup> T cells (B) and CD8<sup>+</sup> GranzymeB<sup>+</sup> T in CD8<sup>+</sup> T cells (C) isolated from a representative mouse for each group.

**Supplementary figure 5. SAHA induced PTPN1 and SOCS3 expression and**

recovered the sensitivity of melanoma cells to T cell killing.

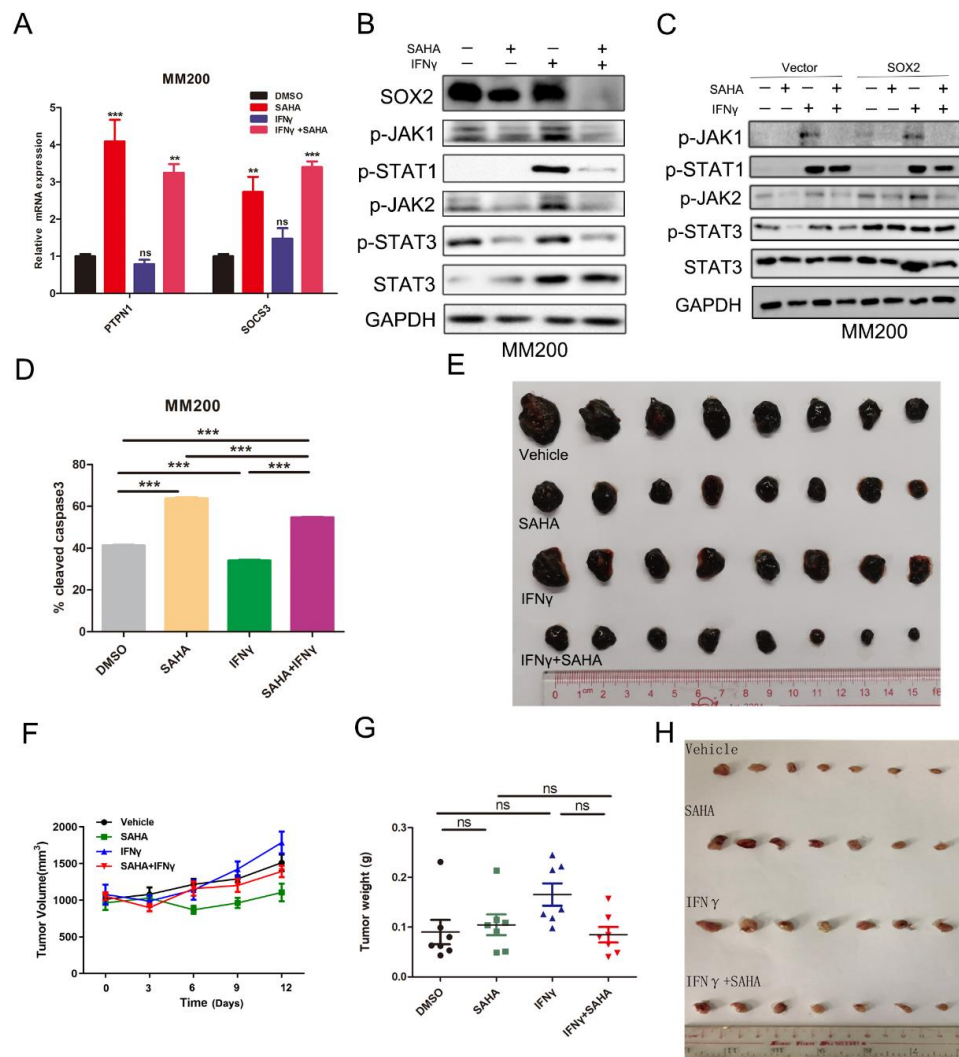

(A) PTNP1 and SOCS3 mRNA level according to qPCR. MM200 cells were treated with 5 $\mu$ M SAHA and 1000 IU/mL IFN $\gamma$  for 24 hr. (B, C) Change of the p-JAK1/2, p-STAT1/3 level determined by western blot. MM200 cells (B), vector or SOX2 OE MM200 cells (C) were treated with 5 $\mu$ M SAHA or 1000 IU/mL IFN $\gamma$  for 24hr. (D) Histogram of the percentage of cleaved caspase-3 positive cells determined by flow cytometry. MM200 cells were pretreated with SAHA or 1000 IU/mL IFN $\gamma$  for 24hr and then co-cultured with T cells for 6-8hr (Tumor: T= 10:1). (F, G) Tumor growth curve and xenografts weight of nude mice. (E, H) The picture of tumors in C57BL/6 mice and nude mice. Error bars indicate SEM. One-way ANOVA test, NS, not



significant; \*\*\*  $p < 0.001$ , \*\*  $p < 0.01$ , \*  $p < 0.05$ .

### Supplementary figure 6. Representative dot plots.

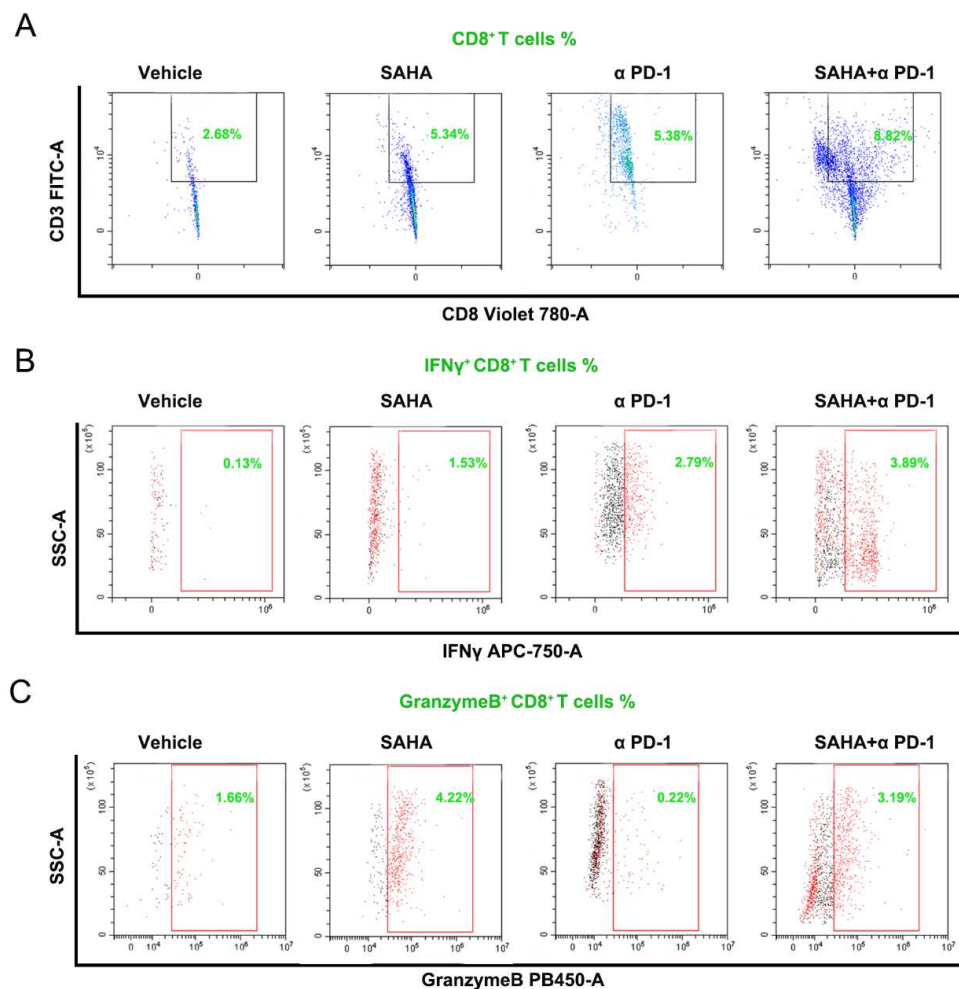

(A-C) Representative dot plots of CD8<sup>+</sup> T in the TILs (A), CD8<sup>+</sup> IFN $\gamma$ <sup>+</sup> T in CD8<sup>+</sup> T cells (B) and CD8<sup>+</sup> GranzymeB<sup>+</sup> T in CD8<sup>+</sup> T cells (C) isolated from a representative mouse for each group.

### Supplementary figure 7. The correlation between SOX2 and clinical response to anti-PD-1 based on CD8 or IFN $\gamma$ expression.

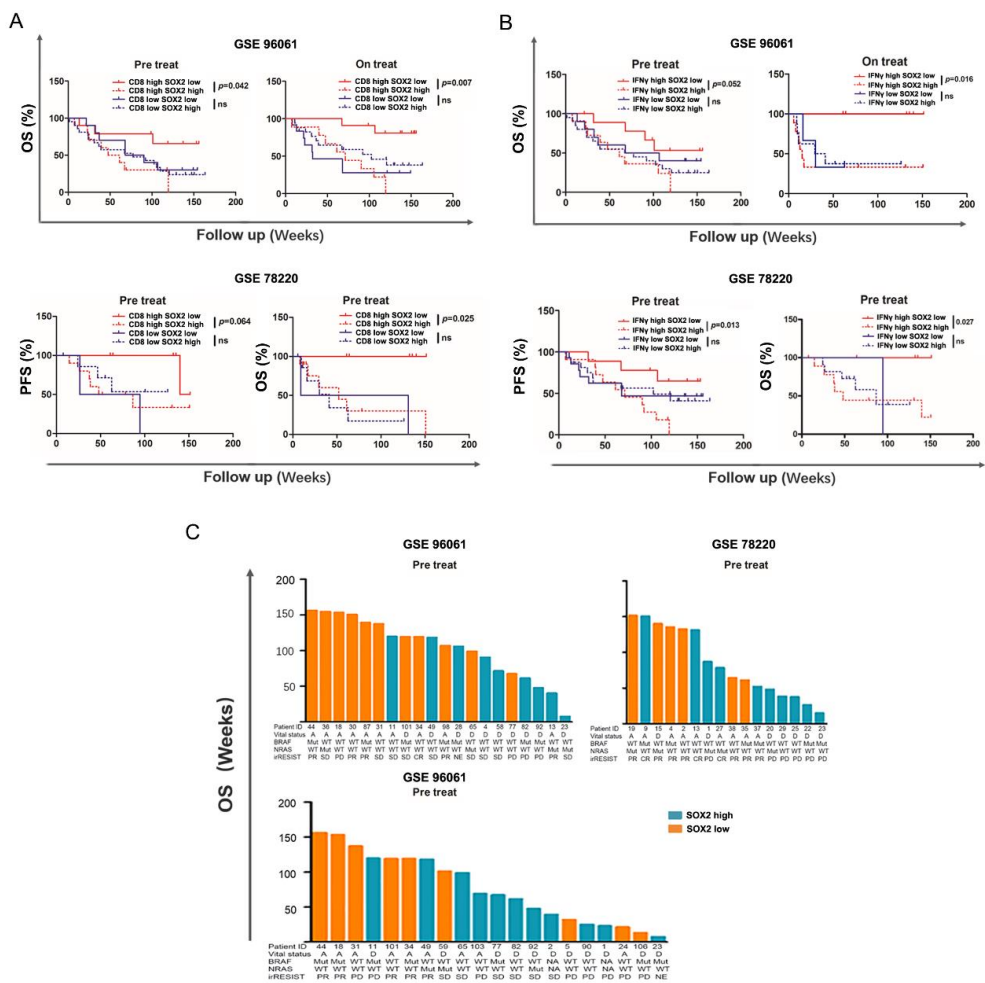

(A) Kaplan-Meier survival curves comparing the OS and PFS based on SOX2 and CD8 status. (B) Kaplan-Meier survival curves comparing the OS and PFS based on SOX2 and IFN $\gamma$  status. (C) Histogram representing the clinical benefit of anti-PD-1 based on SOX2 expression in CD8 high patients. A, alive; D, dead. irRECIST, Immune-related Response Evaluation Criteria in Solid Tumors; CR, complete response; PR, partial response; PD, progressive disease. NS, not significant.

**Supplementary figure 8. The correlation between SOX2 and clinical response to anti-PD-1 in melanoma with PD-L1 low expression.**



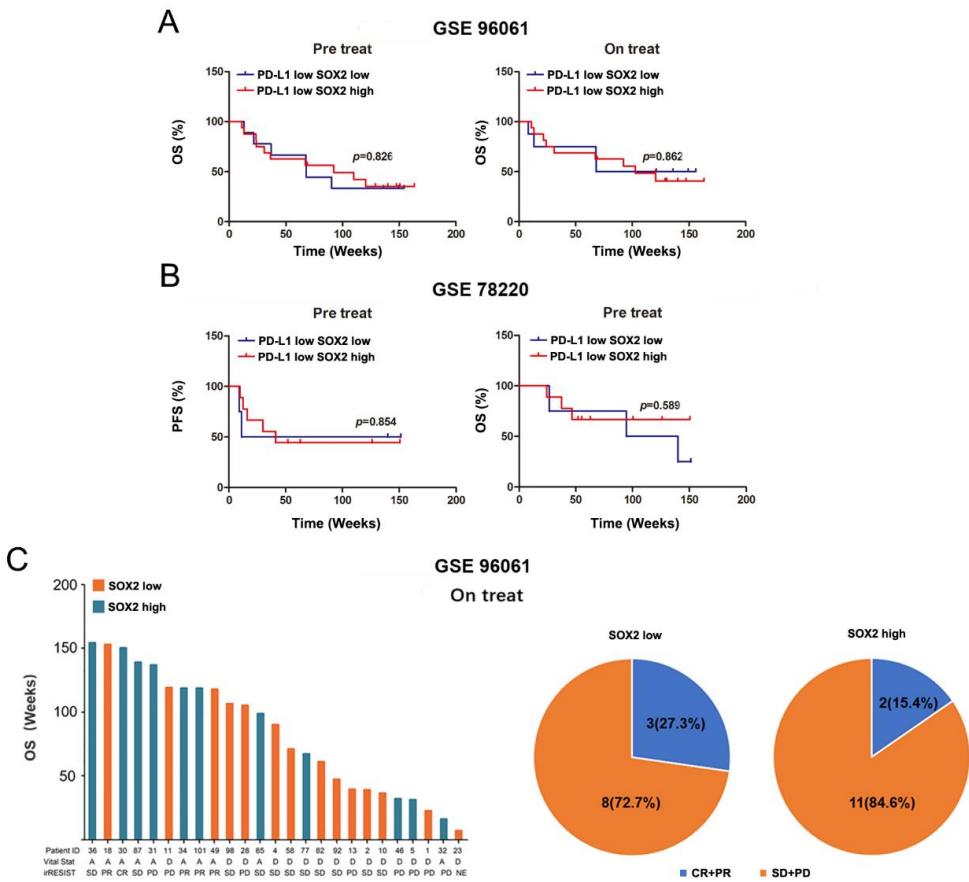

(A, B) Kaplan-Meier survival curves comparing the OS and PFS between the SOX2 high and low group in melanoma with PD-L1 low expression; (C) Left: Histogram representing the clinical benefit of anti-PD-1 based on SOX2 expression in melanoma with PD-L1 low expression. Right: Pie chart of the proportion of response for each group. A, alive; D, dead. irRECIST, Immune-related Response Evaluation Criteria in Solid Tumors; CR, complete response; PR, partial response; PD, progressive.

**Supplementary table 1.** Comparison of the clinicopathological characteristics based on SOX2 and PD-L1 status before nivolumab therapy.

| Characteristics | PD-L1 low tumor (< 50%) |                     | PD-L1 high tumor (> 50%) |        | p |
|-----------------|-------------------------|---------------------|--------------------------|--------|---|
|                 | SOX2 L <sup>1</sup>     | SOX2 H <sup>2</sup> | SOX2 L                   | SOX2 H |   |

|                                 | (n =9)   | (n =16)   | <i>p</i> | (n =11)  | (n =15)   | <i>p</i>    |
|---------------------------------|----------|-----------|----------|----------|-----------|-------------|
| <b>Primary site</b>             |          |           | 0.671    |          |           | 0.228 1.000 |
| Cutaneous                       | 5 (55.6) | 11 (68.8) |          | 5 (45.5) | 11 (73.3) |             |
| Other                           | 4 (44.4) | 5 (31.2)  |          | 6 (54.5) | 4 (26.7)  |             |
| <b>Mutation</b>                 |          |           | 0.397    |          |           | 0.228 1.000 |
| Triple Wt <sup>3,4</sup>        | 5 (55.6) | 5 (31.3)  |          | 6 (54.5) | 4 (26.7)  |             |
| Other                           | 4 (44.4) | 11 (68.8) |          | 5 (45.5) | 11 (73.3) |             |
| <b>Stage</b>                    |          |           | 0.411    |          |           | 0.428 0.404 |
| M1c <sup>5</sup>                | 6 (66.7) | 7 (43.8)  |          | 3 (27.3) | 7 (46.7)  |             |
| Other                           | 3 (33.3) | 9 (56.2)  |          | 8 (72.7) | 8 (53.3)  |             |
| <b>Previous IPI<sup>6</sup></b> |          |           | 1.000    |          |           | 1.000 1.000 |
| Progress                        | 5 (55.6) | 8 (50.0)  |          | 5 (45.5) | 8 (53.3)  |             |
| Naive                           | 4 (44.4) | 8 (50.0)  |          | 6 (54.5) | 7 (46.7)  |             |

1. L, Low expression; 2. H, High expression; 3. Wt, Wild type; 4. Triple Wt, without mutation of BRAF, NRAS and NRF2; 5. M1c, The stage of patients with melanoma is M1c, according to standards in the AJCC of 2018; 6. IPI, International Prognosis Index.

**Supplementary table 2.** Comparison of the clinicopathological characteristics based on SOX2 and PD-L1 status 4 weeks after initiation of nivolumab.

| Characteristics | PD-L1 low tumor (< 50%) |                     |          | PD-L1 high tumor (> 50%) |         |          | <i>p</i> |
|-----------------|-------------------------|---------------------|----------|--------------------------|---------|----------|----------|
|                 | SOX2 L <sup>1</sup>     | SOX2 H <sup>2</sup> |          | SOX2 L                   | SOX2 H  |          |          |
|                 | (n =8)                  | (n =16)             | <i>p</i> | (n =11)                  | (n =14) | <i>p</i> |          |

|                                 |          |           |       |          |           |       |
|---------------------------------|----------|-----------|-------|----------|-----------|-------|
| <b>Primary site</b>             |          |           | 1.000 |          | 0.656     | 0.762 |
| Cutaneous                       | 5 (62.5) | 11 (68.8) |       | 7 (63.6) | 11 (78.6) |       |
| Other                           | 3 (37.5) | 5 (31.2)  |       | 4 (36.4) | 3 (21.4)  |       |
| <b>Mutation</b>                 |          |           | 1.000 |          | 0.115     | 0.567 |
| Triple Wt <sup>3,4</sup>        | 4 (50.0) | 7 (43.8)  |       | 6 (54.5) | 3 (21.4)  |       |
| Other                           | 4 (50)   | 9 (56.3)  |       | 5 (45.5) | 11 (78.6) |       |
| <b>Stage</b>                    |          |           | 0.211 |          | 1.000     | 0.154 |
| M1c <sup>5</sup>                | 6 (75.0) | 7 (43.8)  |       | 3 (27.3) | 5 (35.7)  |       |
| Other                           | 2 (25.0) | 9 (56.2)  |       | 8 (72.7) | 9 (64.3)  |       |
| <b>Previous IPI<sup>6</sup></b> |          |           | 0.667 |          | 1.000     | 0.387 |
| Progress                        | 6 (75.0) | 10 (62.5) |       | 6 (54.5) | 7 (50.0)  |       |
| Naive                           | 2 (25.0) | 6 (37.5)  |       | 5 (45.5) | 7 (50.0)  |       |

1. L, Low expression; 2. H, High expression; 3. Wt, Wild type; 4. Triple Wt, without mutation of BRAF, NRAS and NRF2; 5. M1c, The stage of patients with melanoma is M1c, according to standards in the AJCC of 2018; 6. IPI, International Prognosis Index.

**Supplementary table 3.** Multivariate Cox regression analysis of clinicopathological factors for overall survival in melanoma patients before nivolumab therapy.

|                                 | Univariate Cox  |                     |       |                  |      |        | Multivariate Cox |          |      |                  |       |          |
|---------------------------------|-----------------|---------------------|-------|------------------|------|--------|------------------|----------|------|------------------|-------|----------|
|                                 | PD-L1 low tumor |                     |       | PD-L1 high tumor |      |        | PD-L1 low tumor  |          |      | PD-L1 high tumor |       |          |
|                                 | HR <sup>1</sup> | 95% CI <sup>2</sup> |       | <i>p</i>         | HR   | 95% CI |                  | <i>p</i> | HR   | 95% CI           |       | <i>p</i> |
|                                 |                 | Lower               | Upper |                  |      | Lower  | Upper            |          |      | Lower            | Upper |          |
| <b>Priamray site</b>            |                 |                     |       | 0.51             |      |        |                  | 0.760    |      |                  |       |          |
| Cutaneous                       |                 |                     |       |                  |      |        |                  |          |      |                  |       |          |
| Other                           | 1.41            | 0.51                | 3.91  |                  | 0.86 | 0.32   | 2.30             |          |      |                  |       |          |
| <b>Mutation</b>                 |                 |                     |       | 0.26             |      |        |                  | 0.751    |      |                  |       |          |
| TripleWt <sup>3, 4</sup>        |                 |                     |       |                  |      |        |                  |          |      |                  |       |          |
| Other                           | 1.83            | 0.63                | 5.28  |                  | 1.17 | 0.44   | 3.14             |          |      |                  |       |          |
| <b>Stage</b>                    |                 |                     |       | 0.25             |      |        |                  | 0.000    |      |                  |       | 0.000    |
| M1c <sup>5</sup>                |                 |                     |       |                  |      |        |                  |          |      |                  |       |          |
| Other                           | 0.56            | 0.21                | 1.50  |                  | 0.17 | 0.06   | 0.46             |          | 0.13 | 0.04             | 0.39  |          |
| <b>Previous IPI<sup>6</sup></b> |                 |                     |       | 0.58             |      |        |                  | 0.786    |      |                  |       |          |
| Naïve                           |                 |                     |       |                  |      |        |                  |          |      |                  |       |          |
| Progress                        | 0.76            | 0.28                | 2.03  |                  | 1.14 | 0.44   | 2.96             |          |      |                  |       |          |
| <b>SOX2 Level</b>               |                 |                     |       | 0.86             |      |        |                  | 0.010    |      |                  |       | 0.005    |
| Low                             |                 |                     |       |                  |      |        |                  |          |      |                  |       |          |
| High                            | 0.91            | 0.33                | 2.52  |                  | 4.42 | 1.43   | 13.73            |          | 5.67 | 1.68             | 19.17 |          |

1. HR, Hazard Ratio; 2. CI, Confidence Interval; 3. Wt, Wild type; 4. Triple Wt, without mutation of BRAF, NRAS and NRF2; 5. M1c, The stage of patients with melanoma is M1c, according to standards i the AJCC of 2018; 6. IPI, International Prognosis Index.

**Supplementary table 4.** Multivariate Cox regression analysis of the clinicopathological factors for overall survival in melanoma patients 4 weeks after initiation of nivolumab.

|                                 | Univariate Cox  |                     |       |                  |      |        | Multivariate Cox |       |      |                  |       |       |
|---------------------------------|-----------------|---------------------|-------|------------------|------|--------|------------------|-------|------|------------------|-------|-------|
|                                 | PD-L1 low tumor |                     |       | PD-L1 high tumor |      |        | PD-L1 low tumor  |       |      | PD-L1 high tumor |       |       |
|                                 | HR <sup>1</sup> | 95% CI <sup>2</sup> |       | p                | HR   | 95% CI |                  | p     | HR   | 95% CI           |       | p     |
|                                 |                 | Lower               | Upper |                  |      | Lower  | Upper            |       |      | Lower            | Upper |       |
| <b>Priamray site</b>            |                 |                     |       | 0.89             |      |        |                  | 0.777 |      |                  |       |       |
| Cutaneous                       |                 |                     |       |                  |      |        |                  |       |      |                  |       |       |
| Other                           | 0.92            | 0.28                | 3.00  |                  | 0.85 | 0.27   | 2.67             |       |      |                  |       |       |
| <b>Mutation</b>                 |                 |                     |       | 0.51             |      |        |                  | 0.151 |      |                  |       |       |
| TripleWt <sup>3, 4</sup>        |                 |                     |       |                  |      |        |                  |       |      |                  |       |       |
| Other                           | 1.46            | 0.48                | 4.48  |                  | 2.32 | 0.74   | 7.33             |       |      |                  |       |       |
| <b>Stage</b>                    |                 |                     |       | 0.06             |      |        |                  | 0.091 |      |                  |       | 0.160 |
| M1c <sup>5</sup>                |                 |                     |       |                  |      |        |                  |       |      |                  |       |       |
| Other                           | 0.31            | 0.10                | 1.03  |                  | 0.41 | 0.15   | 1.15             |       | 0.47 | 0.16             | 1.35  |       |
| <b>Previouw IPI<sup>6</sup></b> |                 |                     |       | 0.72             |      |        |                  | 0.929 |      |                  |       |       |
| Naïve                           |                 |                     |       |                  |      |        |                  |       |      |                  |       |       |
| Progress                        | 0.82            | 0.27                | 2.51  |                  | 0.95 | 0.34   | 2.67             |       |      |                  |       |       |
| <b>SOX2 Level</b>               |                 |                     |       | 0.86             |      |        |                  | 0.034 |      |                  |       | 0.047 |
| Low                             |                 |                     |       |                  |      |        |                  |       |      |                  |       |       |
| High                            | 1.11            | 0.34                | 3.61  |                  | 3.98 | 1.11   | 14.23            |       | 3.69 | 1.02             | 13.40 |       |

1. HR, Hazard Ratio; 2. CI, Confidence Interval; 3. Wt, Wild type; 4. Triple Wt, without mutation of BRAF, NRAS and NRF2; 5. M1c, The stage of patients with melanoma is M1c, according to standards in the AJCC of 2018; 6. IPI, International Prognosis Index.
